# Supplementary material for: The Effect of Illumination Patterns during Mung Bean Seed Germination on the Metabolite Composition of the Sprouts
Source: MDPI journal article supplement (doi:10.3390/plants12213772), 2023-11-04
Supplement: s1 [file s1]

# Supplementary Materials.

**Table S1.** The content of metabolite compounds in the dark-exposed sprouts (DS), ppm (mg/kg).

| Metabolite compound                      | Minimum | Maximum | Mean | Standard Error |
|------------------------------------------|---------|---------|------|----------------|
| Oxalate                                  | 17      | 116     | 43   | 26             |
| Lactic acid                              | 49      | 347     | 114  | 71             |
| 3-Hydroxypropionic acid                  | 4       | 11      | 8    | 2              |
| Pyruvic acid                             | 9       | 44      | 23   | 9              |
| Succinic acid                            | 33      | 156     | 100  | 29             |
| Malic acid                               | 176     | 1455    | 489  | 298            |
| Fumaric acid                             | 3       | 14      | 6    | 3              |
| Tartaric acid                            | 15      | 119     | 67   | 26             |
| Citric acid                              | 18      | 370     | 96   | 91             |
| Glyceric acid                            | 22      | 65      | 52   | 13             |
| Methyl-glyceric acid                     | 0       | 18      | 2    | 4              |
| Threonic acid                            | 39      | 247     | 157  | 61             |
| Erythronic acid                          | 7       | 22      | 17   | 5              |
| Erythrono-1.4-lactone+threono-1.4-lacton | 3       | 19      | 12   | 5              |
| Ribonic acid                             | 10      | 51      | 31   | 13             |
| Gluconic acid                            | 7       | 332     | 162  | 112            |
| Gluconic-6-phosphate acid                | 0       | 12      | 3    | 4              |
| 2-Ketogluconic acid*                     |         |         | 6    |                |
| Saccharic acid                           | 9       | 48      | 25   | 13             |
| Nicotinic acid                           | 6       | 40      | 21   | 11             |
| Shikimic acid                            | 7       | 168     | 34   | 40             |
| Quinic acid                              | 0       | 504     | 40   | 134            |
| Caffeic acid                             | 37      | 333     | 88   | 75             |
| 4-Hydroxycinnamic acid                   | 13      | 148     | 40   | 33             |
| Benzoic acid                             | 4       | 12      | 7    | 3              |
| 2.3-dihydrobenzoic acid*                 |         |         | 2    |                |
| Dehydroabietic acid*                     |         |         | 10   |                |
| Azelaic acid                             | 0       | 16      | 4    | 7              |
| Mesoxalic acid*                          |         |         | 4    |                |
| Maleic acid*                             |         |         | 14   |                |
| Phosphoric acid                          | 824     | 1907    | 1295 | 318            |
| Phosphate + methyl-phosphate             | 100     | 486     | 275  | 90             |
| Valine                                   | 43      | 950     | 369  | 274            |
| Leucine + Isoleucine                     | 27      | 736     | 265  | 206            |
| Methionine*                              |         |         | 11   |                |
| Threonine                                | 0       | 54      | 24   | 16             |
| Phenylalanine                            | 9       | 103     | 34   | 30             |
| Tryptophan                               | 0       | 22      | 4    | 7              |
| Lysine + Histidine                       | 52      | 288     | 100  | 63             |
| Arginine + Citrulline                    | 0       | 56      | 19   | 18             |
| $\alpha$ -Alanine                        | 27      | 108     | 65   | 22             |

|                                 |     |      |      |      |
|---------------------------------|-----|------|------|------|
| Glycine                         | 0   | 35   | 9    | 8    |
| Proline                         | 12  | 149  | 59   | 42   |
| Serine                          | 14  | 120  | 49   | 31   |
| Tyrosine                        | 0   | 70   | 8    | 18   |
| Aspartic acid                   | 134 | 608  | 325  | 138  |
| Asparagine                      | 33  | 740  | 291  | 232  |
| Glutamic acid                   | 72  | 443  | 227  | 111  |
| Glutamine                       | 0   | 99   | 18   | 26   |
| Ornithine                       | 0   | 207  | 37   | 64   |
| Ornithine lactam                | 0   | 605  | 197  | 203  |
| β-Alanine                       | 0   | 10   | 3    | 4    |
| Hydroxyproline                  | 0   | 19   | 2    | 5    |
| Oxoproline                      | 0   | 156  | 72   | 51   |
| Pipecolic acid                  | 0   | 21   | 5    | 5    |
| GABA                            | 0   | 37   | 12   | 13   |
| Pentosa                         | 0   | 66   | 8    | 18   |
| Ramnose                         | 0   | 4    | 1    | 1    |
| Fructose                        | 50  | 2564 | 386  | 636  |
| Mannose + Galactose             | 146 | 3698 | 1279 | 862  |
| Glucose                         | 262 | 5549 | 1902 | 1259 |
| Glucose derivatives             | 57  | 532  | 221  | 154  |
| Sorbose                         | 19  | 297  | 57   | 70   |
| Sucrose                         | 275 | 6086 | 2851 | 1765 |
| Rutinose + rutinose derivatives | 0   | 58   | 18   | 18   |
| Raffinose                       | 0   | 144  | 15   | 40   |
| Ethanolamine                    | 0   | 97   | 18   | 25   |
| Glycerol                        | 80  | 505  | 220  | 117  |
| Glycerol-3-phosphate            | 19  | 114  | 62   | 26   |
| Arabinitol                      | 5   | 44   | 18   | 9    |
| Sorbitol                        | 0   | 27   | 13   | 7    |
| Myo-inositol                    | 485 | 3375 | 2188 | 955  |
| Methyl-inositol                 | 831 | 7836 | 3428 | 2041 |
| Ononitol                        | 0   | 76   | 22   | 23   |
| Chiro-inositol                  | 11  | 686  | 284  | 219  |
| Allo-inositol*                  |     |      | 41   |      |
| Desoxyglucitol*                 |     |      | 4    |      |
| Pelargonic acid (C9:0)*         |     |      | 2    |      |
| Undecylic acid (C11:0)          | 0   | 25   | 5    | 9    |
| Tridecylic acid (C13:0)         | 0   | 32   | 6    | 11   |
| Palmitic acid (C16:0 )          | 204 | 859  | 462  | 179  |
| Stearic acid (C18:0 )           | 83  | 322  | 180  | 82   |
| Arachidic acid (C20:0 )*        |     |      | 10   |      |
| Behenic acid (C22:0 )           | 0   | 26   | 3    | 7    |
| Lignoceric acid (C24:0 )        | 0   | 11   | 6    | 4    |
| Oleic acid (C18:1 )             | 0   | 248  | 62   | 58   |
| Linoleic acid (C18:2 )          | 24  | 267  | 127  | 56   |

|                        |    |      |      |      |
|------------------------|----|------|------|------|
| Linolenic acid (C18:3) | 64 | 469  | 277  | 108  |
| MAG 1-C16:0            | 40 | 614  | 181  | 142  |
| MAG 1-C18:0            | 8  | 4748 | 1298 | 1095 |
| MAG 2-C18:2            | 0  | 5    | 1    | 2    |
| Me C18:3               | 0  | 157  | 47   | 46   |
| OH20:0*                |    |      | 10   |      |
| OH26:0                 | 0  | 5    | 1    | 2    |
| OH28:0*                |    |      | 3    |      |
| Isofucoesterol*        |    |      | 10   |      |
| Campesterol            | 0  | 28   | 14   | 7    |
| Stigmasterol           | 54 | 206  | 117  | 39   |
| $\beta$ -Sitosterol    | 74 | 237  | 172  | 49   |
| Pyrogallol             | 0  | 4    | 0.4  | 1    |
| Adenosine              | 0  | 43   | 11   | 14   |
| Urea                   | 23 | 236  | 65   | 54   |
| Uridin                 | 0  | 8    | 1    | 3    |

\*– the metabolite was identified in only one sprout

**Table S2.** The content of metabolite compounds in the light-exposed sprouts (LS), ppm (mg/kg).

| Metabolite compound                      | Minimum | Maximum | Mean | Standard Error |
|------------------------------------------|---------|---------|------|----------------|
| Oxalate                                  | 3       | 23      | 9    | 6              |
| Lactic acid                              | 23      | 106     | 57   | 20             |
| 3-Hydroxypropionic acid                  | 2       | 12      | 5    | 3              |
| Pyruvic acid                             | 9       | 26      | 17   | 5              |
| Succinic acid                            | 29      | 79      | 47   | 13             |
| Malic acid                               | 246     | 1028    | 627  | 252            |
| Fumaric acid                             | 2       | 12      | 4    | 3              |
| Tartaric acid                            | 13      | 98      | 42   | 23             |
| Citric acid                              | 69      | 984     | 441  | 315            |
| Glyceric acid                            | 4       | 23      | 8    | 4              |
| Erythronic acid                          | 0       | 19      | 6    | 6              |
| Erythrono-1.4-lactone+threono-1.4-lacton | 0       | 6       | 1    | 2              |
| Ribonic acid                             | 0       | 41      | 22   | 10             |
| Gluconic acid                            | 5       | 39      | 17   | 11             |
| Saccharic acid                           | 0       | 38      | 17   | 14             |
| Nicotinic acid                           | 8       | 50      | 24   | 12             |
| Shikimic acid                            | 6       | 85      | 41   | 29             |
| Quinic acid                              | 0       | 6       | 2    | 3              |
| Caffeic acid                             | 11      | 95      | 45   | 26             |
| 4-Hydroxycinnamic acid                   | 0       | 40      | 13   | 13             |
| Benzoic acid                             | 2       | 56      | 18   | 16             |
| 2.3-dihydrobenzoic acid                  | 0       | 22      | 2    | 7              |
| Azelaic acid*                            |         |         | 42   |                |
| Citraconic acid                          | 0       | 9       | 1    | 3              |

|                                 |      |      |      |      |
|---------------------------------|------|------|------|------|
| Maleic acid                     | 0    | 3    | 1    | 1    |
| Methylmalonic acid*             |      |      | 10   |      |
| Phosphoric acid                 | 1084 | 3368 | 1710 | 719  |
| Phosphate + methyl-phosphate    | 66   | 388  | 200  | 97   |
| Valine                          | 144  | 707  | 384  | 176  |
| Leucine + Isoleucine            | 93   | 484  | 256  | 112  |
| Methionine                      | 4    | 62   | 27   | 23   |
| Threonine                       | 32   | 124  | 74   | 28   |
| Phenylalanine                   | 50   | 1054 | 464  | 348  |
| Tryptophan                      | 0    | 104  | 28   | 27   |
| Lysine + Histidine              | 288  | 996  | 586  | 221  |
| Arginine + Citrulline           | 68   | 347  | 145  | 79   |
| $\alpha$ -Alanine               | 28   | 108  | 66   | 22   |
| Glycine                         | 5    | 154  | 44   | 44   |
| Proline                         | 7    | 25   | 18   | 6    |
| Serine                          | 28   | 92   | 50   | 20   |
| Tyrosine                        | 9    | 552  | 135  | 177  |
| Aspartic acid                   | 161  | 857  | 482  | 224  |
| Asparagine                      | 81   | 3894 | 2025 | 1079 |
| Glutamic acid                   | 381  | 979  | 543  | 161  |
| Glutamine                       | 20   | 128  | 71   | 31   |
| Ornithine                       | 72   | 870  | 428  | 275  |
| Ornithine lactam                | 196  | 2254 | 885  | 648  |
| $\beta$ -Alanine                | 0    | 23   | 9    | 6    |
| Hydroxyproline                  | 0    | 33   | 4    | 9    |
| Oxoproline                      | 0    | 148  | 53   | 45   |
| Pipecolic acid                  | 0    | 10   | 4    | 3    |
| 5-Hydroxypipecolic acid         | 0    | 2    | 0.2  | 0.5  |
| GABA                            | 25   | 142  | 77   | 33   |
| b-phenyl-a-alanine              | 0    | 20   | 5    | 8    |
| Pentosa                         | 0    | 8    | 2    | 3    |
| Ramnose                         | 0    | 9    | 2    | 3    |
| Fructose                        | 6    | 40   | 26   | 8    |
| Mannose + Galactose             | 173  | 755  | 471  | 194  |
| Glucose                         | 214  | 994  | 652  | 264  |
| Glucose derivatives             | 64   | 432  | 251  | 135  |
| Sorbose                         | 10   | 83   | 40   | 24   |
| Sucrose                         | 102  | 1136 | 506  | 272  |
| Rutinose + rutinose derivatives | 0    | 356  | 89   | 104  |
| Raffinose                       | 0    | 111  | 17   | 34   |
| Ethanolamine                    | 5    | 59   | 23   | 14   |
| Glycerol                        | 0    | 169  | 85   | 51   |
| Glycerol-3-phosphate            | 13   | 82   | 36   | 21   |
| Arabinitol                      | 18   | 53   | 33   | 13   |
| Sorbitol                        | 17   | 74   | 35   | 20   |
| Myo-inositol                    | 11   | 236  | 100  | 69   |

|                          |      |       |      |      |
|--------------------------|------|-------|------|------|
| Methyl-inositol          | 2897 | 10633 | 5465 | 2269 |
| Ononitol                 | 18   | 322   | 110  | 105  |
| Chiro-inositol           | 101  | 849   | 422  | 229  |
| Allo-inositol            | 0    | 24    | 2    | 7    |
| Desoxyglucitol           | 0    | 25    | 14   | 5    |
| Galactinols              | 0    | 100   | 17   | 27   |
| Phytol                   | 4    | 28    | 15   | 6    |
| $\alpha$ -tocopherol     | 0    | 3     | 0.5  | 1.1  |
| Pelargonic acid (C9:0)   | 0    | 2     | 0.2  | 0.7  |
| Undecylic acid (C11:0)   | 0    | 9     | 1    | 3    |
| Palmitic acid (C16:0 )   | 174  | 423   | 297  | 73   |
| Stearic acid (C18:0 )    | 50   | 166   | 94   | 29   |
| Arachidic acid (C20:0 )  | 0    | 5     | 1    | 2    |
| Behenic acid (C22:0 )    | 0    | 21    | 5    | 8    |
| Lignoceric acid (C24:0 ) | 3    | 9     | 6    | 2    |
| Cerotic acid (C26:0 )    | 0    | 6     | 1    | 2    |
| Oleic acid (C18:1 )      | 0    | 104   | 20   | 32   |
| Linoleic acid (C18:2 )   | 0    | 95    | 49   | 34   |
| Linolenic acid           | 112  | 418   | 262  | 111  |
| MAG 1-C16:0              | 5    | 317   | 147  | 123  |
| MAG 1-C18:0              | 1    | 1675  | 503  | 515  |
| Me C18:3                 | 0    | 152   | 20   | 46   |
| OH18:0                   | 0    | 6     | 1    | 2    |
| OH22:0*                  |      |       | 4    |      |
| OH24:0                   | 0    | 6     | 1    | 2    |
| OH26:0                   | 0    | 13    | 3    | 4    |
| OH28:0                   | 0    | 16    | 6    | 4    |
| Sterol 486               | 0    | 6     | 1    | 2    |
| Campesterol              | 0    | 29    | 12   | 9    |
| Stigmasterol             | 83   | 250   | 168  | 64   |
| $\beta$ -Sitosterol      | 13   | 114   | 56   | 36   |
| Pyrogallol               | 0    | 9     | 4    | 3    |
| Adenosine                | 0    | 5     | 1    | 2    |
| Antirrhinoside           | 0    | 5     | 0.7  | 1.7  |
| Urea                     | 48   | 670   | 292  | 181  |

\*– the metabolite was identified in only one sprout

**Table S3.** The relative content of some metabolites with reference to the total content of the corresponding groups of compounds in the dark-exposed sprouts (DS), %.

| Metabolite compound     | Minimum | Maximum | Mean | Standard Error |
|-------------------------|---------|---------|------|----------------|
| Organic acids           |         |         |      |                |
| Oxalate                 | 0.84    | 4.69    | 2.66 | 1.07           |
| Lactic acid             | 3.95    | 16.65   | 7.11 | 3.02           |
| 3-Hydroxypropionic acid | 0.30    | 1.00    | 0.54 | 0.19           |

|                                          |       |       |       |      |
|------------------------------------------|-------|-------|-------|------|
| Pyruvic acid                             | 0.64  | 2.46  | 1.49  | 0.53 |
| Succinic acid                            | 4.56  | 7.93  | 6.30  | 0.98 |
| Malic acid                               | 19.28 | 42.59 | 30.13 | 6.35 |
| Fumaric acid                             | 0.24  | 2.28  | 0.52  | 0.49 |
| Tartaric acid                            | 1.38  | 7.51  | 4.06  | 1.52 |
| Citric acid                              | 0.94  | 11.46 | 5.27  | 3.37 |
| Glyceric acid                            | 1.87  | 4.29  | 3.35  | 0.70 |
| Methyl-glyceric acid                     | 0.00  | 0.88  | 0.20  | 0.34 |
| Threonic acid                            | 3.75  | 16.30 | 9.75  | 3.55 |
| Erythronic acid                          | 0.00  | 1.53  | 0.63  | 0.58 |
| Erythrono-1.4-lactone+threono-1.4-lacton | 0.41  | 1.21  | 0.75  | 0.28 |
| Ribonic acid                             | 0.31  | 3.38  | 2.01  | 0.67 |
| Gluconic acid                            | 1.45  | 18.79 | 9.42  | 5.42 |
| Gluconic-6-phosphate acid                | 0.00  | 1.08  | 0.31  | 0.33 |
| 2-Ketogluconic acid*                     |       |       | 0.34  |      |
| Saccharic acid                           | 0.62  | 2.79  | 1.65  | 0.74 |
| Nicotinic acid                           | 0.47  | 3.21  | 1.34  | 0.77 |
| Shikimic acid                            | 0.48  | 4.92  | 1.90  | 1.06 |
| Quinic acid                              | 0.00  | 14.77 | 1.88  | 4.22 |
| Caffeic acid                             | 1.47  | 13.47 | 5.32  | 2.68 |
| 4-Hydroxycinnamic acid                   | 0.53  | 5.98  | 2.54  | 1.31 |
| Benzoic acid                             | 0.21  | 0.79  | 0.43  | 0.17 |
| 2,3-dihydrobenzoic acid                  | 0.00  | 0.09  | 0.01  | 0.02 |
| Dehydroabietic acid*                     |       |       | 1.86  |      |
| Azelaic acid                             | 0.00  | 1.37  | 0.26  | 0.45 |
| Mesoxalic acid*                          |       |       | 0.16  |      |
| Maleic acid*                             |       |       | 0.28  |      |
| Free amino acids                         |       |       |       |      |
| Valine                                   | 6.67  | 22.69 | 15.39 | 4.51 |
| Leucine + Isoleucine                     | 4.25  | 15.83 | 10.97 | 3.49 |
| Methionine*                              |       |       | 0.26  |      |
| Threonine                                | 0.00  | 1.79  | 1.07  | 0.39 |
| Phenylalanine                            | 0.75  | 2.83  | 1.42  | 0.58 |
| Tryptophan                               | 0.00  | 0.73  | 0.14  | 0.24 |
| Lysine + Histidine                       | 2.41  | 17.53 | 5.60  | 3.88 |
| Arginine + Citrulline                    | 0.00  | 2.18  | 0.89  | 0.69 |
| $\alpha$ -Alanine                        | 1.54  | 11.00 | 3.94  | 2.45 |
| Glycine                                  | 0.01  | 0.66  | 0.41  | 0.18 |
| Proline                                  | 1.04  | 7.82  | 3.04  | 1.78 |
| Serine                                   | 1.04  | 2.99  | 2.27  | 0.53 |
| Tyrosine                                 | 0.00  | 1.33  | 0.27  | 0.43 |
| Aspartic acid                            | 8.15  | 28.01 | 16.84 | 5.28 |
| Asparagine                               | 5.16  | 29.33 | 12.69 | 7.02 |
| Glutamic acid                            | 7.60  | 19.26 | 11.63 | 3.22 |
| Glutamine                                | 0.00  | 4.34  | 0.95  | 1.25 |
| Ornithine                                | 0.00  | 7.76  | 1.36  | 1.96 |

|                                 |       |       |       |       |
|---------------------------------|-------|-------|-------|-------|
| Ornithine lactam                | 0.00  | 16.09 | 6.98  | 4.69  |
| β-Alanine                       | 0.00  | 0.36  | 0.12  | 0.14  |
| Hydroxyproline                  | 0.00  | 0.87  | 0.06  | 0.22  |
| Oxoproline                      | 0.00  | 7.57  | 3.17  | 2.27  |
| Pipecolic acid                  | 0.00  | 0.94  | 0.24  | 0.23  |
| GABA                            | 0.00  | 1.95  | 0.53  | 0.60  |
| Saccharides                     |       |       |       |       |
| Pentosa                         | 0.00  | 0.41  | 0.07  | 0.12  |
| Ramnose                         | 0.00  | 0.10  | 0.01  | 0.03  |
| Fructose                        | 1.72  | 19.39 | 5.60  | 4.92  |
| Mannose + Galactose             | 12.21 | 25.06 | 18.94 | 4.18  |
| Glucose + Glucose derivatives   | 18.87 | 44.37 | 33.63 | 6.92  |
| Sorbose                         | 0.34  | 2.24  | 0.94  | 0.60  |
| Sucrose                         | 25.65 | 55.70 | 40.28 | 9.95  |
| Rutinose + rutinose derivatives | 0.00  | 1.30  | 0.35  | 0.41  |
| Raffinose                       | 0.00  | 1.54  | 0.18  | 0.47  |
| Total monosaccharides           | 43.97 | 74.09 | 59.20 | 9.80  |
| Total disaccharides             | 25.91 | 56.03 | 40.63 | 9.81  |
| Total trisaccharides            | 0.00  | 1.54  | 0.18  | 0.47  |
| Alcohols                        |       |       |       |       |
| Ethanolamine                    | 0.00  | 1.32  | 0.26  | 0.34  |
| Glycerol                        | 1.22  | 13.73 | 4.67  | 3.54  |
| Glycerol-3-phosphate            | 0.42  | 6.77  | 1.40  | 1.60  |
| Arabinitol                      | 0.14  | 0.77  | 0.35  | 0.19  |
| Sorbitol                        | 0.00  | 0.28  | 0.20  | 0.07  |
| Myo-inositol                    | 18.10 | 49.43 | 34.74 | 8.33  |
| Methyl-inositol                 | 40.63 | 75.78 | 54.37 | 9.55  |
| Ononitol                        | 0.00  | 0.65  | 0.27  | 0.21  |
| Chiro-inositol                  | 0.68  | 8.44  | 3.72  | 2.17  |
| Allo-inositol*                  |       |       | 0.43  |       |
| Desoxyglucitol*                 |       |       | 0.04  |       |
| Fatty acids                     |       |       |       |       |
| Pelargonic acid (C9:0)          |       |       | 0.21  |       |
| Undecylic acid (C11:0)          | 0.00  | 1.41  | 0.32  | 0.55  |
| Tridecylic acid (C13:0)         | 0.00  | 1.48  | 0.32  | 0.58  |
| Palmitic acid (C16:0 )          | 31.64 | 61.76 | 39.73 | 7.95  |
| Stearic acid (C18:0 )           | 11.05 | 23.61 | 14.92 | 3.62  |
| Arachidic acid (C20:0 )         |       |       | 0.92  |       |
| Behenic acid (C22:0 )           | 0.00  | 1.31  | 0.19  | 0.44  |
| Lignoceric acid (C24:0 )        | 0.00  | 0.98  | 0.46  | 0.32  |
| Oleic acid (C18:1 )             | 0.00  | 11.64 | 4.99  | 2.68  |
| Linoleic acid (C18:2 )          | 3.98  | 13.16 | 10.81 | 2.68  |
| Linolenic acid (C18:3)          | 10.48 | 36.25 | 28.04 | 7.41  |
| Total saturated fatty acids     | 45.01 | 82.70 | 56.17 | 10.73 |
| Total unsaturated fatty acids   | 17.30 | 54.99 | 43.83 | 10.73 |
| Phytosterols                    |       |       |       |       |

|                                        |       |       |       |      |
|----------------------------------------|-------|-------|-------|------|
| Campesterol                            | 0.00  | 9.13  | 4.47  | 2.18 |
| Stigmasterol                           | 28.99 | 49.14 | 38.44 | 4.77 |
| $\beta$ -Sitosterol                    | 50.08 | 61.88 | 56.87 | 3.24 |
| Isofucosterol                          |       |       | 3.29  |      |
| Phenolic acids                         |       |       |       |      |
| Caffeic acid                           | 48.67 | 78.52 | 63.68 | 8.09 |
| 4-Hydroxycinnamic acid                 | 16.53 | 45.23 | 30.38 | 7.62 |
| Benzoic acid + 2,3-dihydrobenzoic acid | 2.34  | 10.25 | 5.77  | 2.02 |

\*– the metabolite was identified in only one sprout

**Table S4.** The relative content of some metabolites with reference to the total content of the corresponding groups of compounds in the light-exposed sprouts (LS), %.

| Metabolite compound                      | Minimum | Maximum | Mean  | Standard Error |
|------------------------------------------|---------|---------|-------|----------------|
| Organic acids                            |         |         |       |                |
| Oxalate                                  | 0.17    | 1.21    | 0.65  | 0.33           |
| Lactic acid                              | 1.26    | 10.37   | 4.85  | 3.16           |
| 3-Hydroxypropionic acid                  | 0.15    | 1.04    | 0.42  | 0.28           |
| Pyruvic acid                             | 0.73    | 1.97    | 1.23  | 0.43           |
| Succinic acid                            | 1.49    | 9.03    | 3.84  | 2.49           |
| Malic acid                               | 33.53   | 60.68   | 45.06 | 7.72           |
| Fumaric acid                             | 0.17    | 0.59    | 0.29  | 0.10           |
| Tartaric acid                            | 1.44    | 5.28    | 2.84  | 1.13           |
| Citric acid                              | 10.42   | 43.05   | 25.92 | 11.14          |
| Glyceric acid                            | 0.35    | 2.51    | 0.66  | 0.55           |
| Erythronic acid                          | 0.00    | 0.99    | 0.42  | 0.33           |
| Erythrono-1,4-lactone+threono-1,4-lacton | 0.00    | 0.62    | 0.07  | 0.18           |
| Ribonic acid                             | 0.00    | 2.31    | 1.45  | 0.52           |
| Gluconic acid                            | 0.54    | 2.38    | 1.24  | 0.52           |
| Saccharic acid                           | 0.00    | 2.81    | 1.21  | 0.76           |
| Nicotinic acid                           | 0.51    | 7.22    | 2.07  | 1.96           |
| Shikimic acid                            | 0.78    | 5.57    | 2.66  | 1.44           |
| Quinic acid                              | 0.00    | 0.75    | 0.19  | 0.30           |
| Caffeic acid                             | 1.68    | 7.72    | 2.96  | 1.52           |
| 4-Hydroxycinnamic acid                   | 0.00    | 1.94    | 0.56  | 0.69           |
| Benzoic acid                             | 0.00    | 2.44    | 0.75  | 0.77           |
| 2,3-dihydrobenzoic acid                  | 0.00    | 1.20    | 0.13  | 0.35           |
| Azelaic acid                             |         |         | 5.20  |                |
| Citraconic acid                          | 0.00    | 1.11    | 0.11  | 0.30           |
| Maleic acid                              | 0.00    | 0.15    | 0.03  | 0.05           |
| Methylmalonic acid                       |         |         | 0.52  |                |
| Free amino acids                         |         |         |       |                |
| Valine                                   | 2.04    | 7.52    | 5.54  | 1.41           |
| Leucine + Isoleucine                     | 1.50    | 5.64    | 3.75  | 1.00           |
| Methionine                               | 0.07    | 1.64    | 0.49  | 0.53           |
| Threonine                                | 0.79    | 1.52    | 1.09  | 0.21           |

|                                 |       |       |       |       |
|---------------------------------|-------|-------|-------|-------|
| Phenylalanine                   | 1.10  | 10.70 | 5.97  | 3.23  |
| Tryptophan                      | 0.00  | 1.28  | 0.41  | 0.37  |
| Lysine + Histidine              | 6.33  | 12.25 | 8.76  | 1.68  |
| Arginine + Citrulline           | 1.12  | 3.59  | 2.10  | 0.68  |
| $\alpha$ -Alanine               | 0.32  | 1.91  | 1.05  | 0.41  |
| Glycine                         | 0.14  | 1.76  | 0.60  | 0.47  |
| Proline                         | 0.08  | 0.47  | 0.28  | 0.10  |
| Serine                          | 0.49  | 1.28  | 0.75  | 0.25  |
| Tyrosine                        | 0.25  | 5.83  | 1.84  | 2.26  |
| Aspartic acid                   | 1.84  | 18.12 | 8.14  | 4.89  |
| Asparagine                      | 1.40  | 41.04 | 29.08 | 11.20 |
| Glutamic acid                   | 3.95  | 13.71 | 8.28  | 2.82  |
| Glutamine                       | 0.31  | 2.06  | 1.10  | 0.46  |
| Ornithine                       | 2.18  | 9.48  | 5.68  | 2.50  |
| Ornithine lactam                | 4.59  | 38.88 | 12.93 | 8.73  |
| $\beta$ -Alanine                | 0.00  | 0.28  | 0.12  | 0.07  |
| Hydroxyproline                  | 0.00  | 0.41  | 0.05  | 0.12  |
| Oxoproline                      | 0.00  | 2.55  | 0.73  | 0.67  |
| Pipecolic acid                  | 0.00  | 0.13  | 0.07  | 0.05  |
| 5-Hydroxypipecolic acid         |       |       | 0.02  |       |
| GABA                            | 0.55  | 1.87  | 1.14  | 0.38  |
| b-phenyl-a-alanine              | 0.00  | 0.20  | 0.06  | 0.09  |
| Saccharides                     |       |       |       |       |
| Pentosa                         | 0.00  | 0.27  | 0.07  | 0.10  |
| Ramnose                         | 0.00  | 0.30  | 0.08  | 0.09  |
| Fructose                        | 0.88  | 4.03  | 1.38  | 0.82  |
| Mannose + Galactose             | 15.65 | 29.40 | 22.92 | 3.68  |
| Glucose + Glucose derivatives   | 29.63 | 55.54 | 43.79 | 6.94  |
| Sorbose                         | 0.75  | 3.39  | 1.94  | 0.75  |
| Sucrose                         | 8.73  | 51.69 | 25.53 | 10.93 |
| Rutinose + rutinose derivatives |       |       |       |       |
| Raffinose                       | 0.00  | 3.53  | 0.59  | 1.10  |
| Total monosaccharides           | 47.67 | 86.93 | 70.19 | 10.45 |
| Total disaccharides             | 13.01 | 51.82 | 29.22 | 10.07 |
| Total trisaccharides            | 0.00  | 3.53  | 0.59  | 1.10  |
| Alcohols                        |       |       |       |       |
| Ethanolamine                    | 0.07  | 1.10  | 0.44  | 0.30  |
| Glycerol                        | 0.00  | 4.05  | 1.51  | 0.99  |
| Glycerol-3-phosphate            | 0.29  | 0.98  | 0.57  | 0.21  |
| Arabinitol                      | 0.31  | 1.26  | 0.55  | 0.25  |
| Sorbitol                        | 0.32  | 0.89  | 0.54  | 0.15  |
| Myo-inositol                    | 0.21  | 5.22  | 1.59  | 1.28  |
| Methyl-inositol                 | 79.63 | 94.18 | 85.75 | 4.09  |
| Ononitol                        | 0.53  | 3.66  | 1.48  | 1.06  |
| Chiro-inositol                  | 0.90  | 10.24 | 6.70  | 2.08  |
| Allo-inositol*                  |       |       | 0.22  |       |

|                                        |       |        |       |       |
|----------------------------------------|-------|--------|-------|-------|
| Desoxyglucitol                         | 0.00  | 0.40   | 0.22  | 0.11  |
| Phytol                                 | 0.06  | 0.62   | 0.26  | 0.15  |
| Fatty acids                            |       |        |       |       |
| Pelargonic acid (C9:0)                 | 0.00  | 0.36   | 0.04  | 0.10  |
| Undecylic acid (C11:0)                 | 0.00  | 1.43   | 0.15  | 0.41  |
| Palmitic acid (C16:0 )                 | 33.26 | 48.99  | 40.17 | 4.78  |
| Stearic acid (C18:0 )                  | 0.00  | 18.34  | 11.43 | 4.10  |
| Arachidic acid (C20:0 )                | 0.00  | 0.47   | 0.13  | 0.18  |
| Behenic acid (C22:0 )                  | 0.00  | 4.83   | 0.99  | 1.67  |
| Lignoceric acid (C24:0 )               | 0.52  | 1.68   | 0.86  | 0.29  |
| Cerotic acid (C26:0 )                  | 0.00  | 1.24   | 0.53  | 0.41  |
| Oleic acid (C18:1 )                    | 0.00  | 12.07  | 2.65  | 3.67  |
| Linoleic acid (C18:2 )                 | 0.00  | 10.47  | 6.09  | 3.09  |
| Linolenic acid                         | 24.84 | 45.71  | 36.16 | 6.26  |
| Phytosterols                           |       |        |       |       |
| Sterol 486                             | 0.00  | 1.63   | 0.37  | 0.65  |
| Campesterol                            | 0.00  | 8.51   | 4.26  | 2.40  |
| Stigmasterol                           | 56.74 | 86.25  | 74.03 | 8.69  |
| $\beta$ -Sitosterol                    | 13.68 | 37.99  | 21.33 | 7.18  |
| Phenolic acids                         |       |        |       |       |
| Caffeic acid                           | 31.41 | 100.00 | 66.00 | 21.32 |
| 4-Hydroxycinnamic acid**               | 0.00  | 30.27  | 15.47 | 12.14 |
| Benzoic acid + 2,3-dihydrobenzoic acid | 0.00  | 46.79  | 16.21 | 14.98 |

\*– the metabolite was identified in only one sprout

\*\*– the value is calculated only for LS of accessions k-14408 and k-14016

**Table S5.** The results of one-way ANOVA (analysis of variance) to identify associations between the metabolite content variability in mung bean sprouts and the conditions of their germination.

[illegible]

| Effect            | Degr. of Freedom | SS                   | MS        | F    | p                     | SS                                  | MS        | F    | p                     | SS               | MS         | F    | p                     |
|-------------------|------------------|----------------------|-----------|------|-----------------------|-------------------------------------|-----------|------|-----------------------|------------------|------------|------|-----------------------|
|                   |                  | threonic acid        |           |      |                       | threono-lactone + erythrono-lactone |           |      |                       | gluconic acid    |            |      |                       |
| Conditions        | 1                | 172084.3             | 172084.3  | 93.0 | 0.04×10 <sup>-8</sup> | 877.3                               | 877.3     | 54.0 | 0.01×10 <sup>-5</sup> | 146714.8         | 146714.8   | 23.2 | 0.01×10 <sup>-2</sup> |
| Error             | 26               | 48120.4              | 1850.8    |      |                       | 422.4                               | 16.2      |      |                       | 164686.1         | 6334.1     |      |                       |
| Total             | 27               | 220204.7             |           |      |                       | 1299.7                              |           |      |                       | 311400.9         |            |      |                       |
| η <sup>2</sup> ,% |                  | 78.1                 |           |      |                       | 67.5                                |           |      |                       | 47.1             |            |      |                       |
|                   |                  | gluconic-6-phosphate |           |      |                       | methionine                          |           |      |                       | threonine        |            |      |                       |
| Conditions        | 1                | 190.8                | 190.8     | 19.7 | 0.01×10 <sup>-2</sup> | 4885.1                              | 4885.1    | 18.2 | 0.02×10 <sup>-2</sup> | 17492.6          | 17492.6    | 34.2 | 0.04×10 <sup>-4</sup> |
| Error             | 26               | 251.8                | 9.7       |      |                       | 6975.1                              | 268.3     |      |                       | 13301.6          | 511.6      |      |                       |
| Total             | 27               | 442.6                |           |      |                       | 11860.2                             |           |      |                       | 30794.2          |            |      |                       |
| η <sup>2</sup> ,% |                  | 43.1                 |           |      |                       | 41.2                                |           |      |                       | 56.8             |            |      |                       |
|                   |                  | phenylalanine        |           |      |                       | tryptophan                          |           |      |                       | glycine          |            |      |                       |
| Conditions        | 1                | 1295678.6            | 1295678.6 | 21.3 | 0.01×10 <sup>-2</sup> | 3793.1                              | 3793.1    | 9.7  | 0.04×10 <sup>-1</sup> | 8523.9           | 8523.9     | 8.6  | 0.01                  |
| Error             | 26               | 1582962.1            | 60883.2   |      |                       | 10166.3                             | 391.0     |      |                       | 25636.0          | 986.0      |      |                       |
| Total             | 27               | 2878640.7            |           |      |                       | 13959.4                             |           |      |                       | 34159.9          |            |      |                       |
| η <sup>2</sup> ,% |                  | 45.0                 |           |      |                       | 27.2                                |           |      |                       | 25.0             |            |      |                       |
|                   |                  | tyrosine             |           |      |                       | histidine + lysine                  |           |      |                       | asparagine       |            |      |                       |
| Conditions        | 1                | 112305.0             | 112305.0  | 7.1  | 0.01                  | 1653298.9                           | 1653298.9 | 62.5 | 0.02×10 <sup>-6</sup> | 21067674.4       | 21067674.4 | 34.6 | 0.03×10 <sup>-4</sup> |
| Error             | 26               | 412569.3             | 15868.0   |      |                       | 688165.4                            | 26467.9   |      |                       | 15834159.1       | 609006.1   |      |                       |
| Total             | 27               | 524874.3             |           |      |                       | 2341464.3                           |           |      |                       | 36901833.5       |            |      |                       |
| η <sup>2</sup> ,% |                  | 21.4                 |           |      |                       | 70.6                                |           |      |                       | 57.1             |            |      |                       |
|                   |                  | aspartate            |           |      |                       | b-alanine                           |           |      |                       | ornithine lactam |            |      |                       |
| Conditions        | 1                | 173274.7             | 173274.7  | 5.0  | 0.03                  | 207.4                               | 207.4     | 7.5  | 0.01                  | 3451557.9        | 3451557.9  | 15.0 | 0.01×10 <sup>-1</sup> |
| Error             | 26               | 899660.9             | 34602.3   |      |                       | 718.0                               | 27.6      |      |                       | 5989713.3        | 230373.6   |      |                       |
| Total             | 27               | 1072935.6            |           |      |                       | 925.4                               |           |      |                       | 9441271.2        |            |      |                       |
| η <sup>2</sup> ,% |                  | 16.1                 |           |      |                       | 22.4                                |           |      |                       | 36.6             |            |      |                       |
|                   |                  |                      |           |      |                       |                                     |           |      |                       |                  |            |      |                       |

| Effect            | Degr. of Freedom | SS                    | MS       | F    | p                     | SS                   | MS       | F    | p                     | SS              | MS         | F    | p                     |
|-------------------|------------------|-----------------------|----------|------|-----------------------|----------------------|----------|------|-----------------------|-----------------|------------|------|-----------------------|
|                   |                  | glutamate             |          |      |                       | glutamine            |          |      |                       | proline         |            |      |                       |
| Conditions        | 1                | 696040.1              | 696040.1 | 36.4 | 0.02×10 <sup>-4</sup> | 19760.0              | 19760.0  | 23.9 | 0.04×10 <sup>-3</sup> | 11952.2         | 11952.2    | 13.3 | 0.01×10 <sup>-1</sup> |
| Error             | 26               | 497461.5              | 19133.1  |      |                       | 21478.3              | 826.1    |      |                       | 23294.5         | 895.9      |      |                       |
| Total             | 27               | 1193501.6             |          |      |                       | 41238.3              |          |      |                       | 35246.7         |            |      |                       |
| η <sup>2</sup> ,% |                  | 58.3                  |          |      |                       | 47.9                 |          |      |                       | 33.9            |            |      |                       |
|                   |                  | citrulline – arginine |          |      |                       | GABA                 |          |      |                       | ornithine       |            |      |                       |
| Conditions        | 1                | 110524.4              | 110524.4 | 34.1 | 0.04×10 <sup>-4</sup> | 29192.8              | 29192.8  | 45.9 | 0.03×10 <sup>-4</sup> | 1069021.0       | 1069021.0  | 26.8 | 0.02×10 <sup>-3</sup> |
| Error             | 26               | 84393.7               | 3245.9   |      |                       | 16545.0              | 636.3    |      |                       | 1037576.8       | 39906.8    |      |                       |
| Total             | 27               | 194918.0              |          |      |                       | 45737.8              |          |      |                       | 2106597.7       |            |      |                       |
| η <sup>2</sup> ,% |                  | 56.7                  |          |      |                       | 63.8                 |          |      |                       | 50.7            |            |      |                       |
|                   |                  | b-phenyl-a-alanine    |          |      |                       | glycerol             |          |      |                       | arabinitol      |            |      |                       |
| Conditions        | 1                | 193.0                 | 193.0    | 6.2  | 0.02                  | 126561.3             | 126561.3 | 15.6 | 0.01×10 <sup>-1</sup> | 1711.4          | 1711.4     | 13.0 | 0.01×10 <sup>-1</sup> |
| Error             | 26               | 803.3                 | 30.9     |      |                       | 211092.0             | 8118.9   |      |                       | 3421.6          | 131.6      |      |                       |
| Total             | 27               | 996.3                 |          |      |                       | 337653.3             |          |      |                       | 5133.0          |            |      |                       |
| η <sup>2</sup> ,% |                  | 19.4                  |          |      |                       | 37.5                 |          |      |                       | 33.3            |            |      |                       |
|                   |                  | threitol + erythritol |          |      |                       | glycerol-3-phosphate |          |      |                       | methyl-inositol |            |      |                       |
| Conditions        | 1                | 187.7                 | 187.7    | 9.2  | 0.01                  | 4533.1               | 4533.1   | 8.3  | 0.01                  | 29051842.5      | 29051842.5 | 6.2  | 0.02                  |
| Error             | 26               | 532.5                 | 20.5     |      |                       | 14122.6              | 543.2    |      |                       | 121077779.1     | 4656837.7  |      |                       |
| Total             | 27               | 720.2                 |          |      |                       | 18655.7              |          |      |                       | 150129621.6     |            |      |                       |
| η <sup>2</sup> ,% |                  | 26.1                  |          |      |                       | 24.3                 |          |      |                       | 19.4            |            |      |                       |
|                   |                  | desoxyglucitol        |          |      |                       | sorbitol             |          |      |                       | ononitol        |            |      |                       |
| Conditions        | 1                | 1259.8                | 1259.8   | 83.0 | 0.01×10 <sup>-7</sup> | 3167.3               | 3167.3   | 14.3 | 0.01×10 <sup>-1</sup> | 54508.1         | 54508.1    | 9.4  | 0.01                  |
| Error             | 26               | 394.5                 | 15.2     |      |                       | 5766.3               | 221.8    |      |                       | 151029.6        | 5808.8     |      |                       |
| Total             | 27               | 1654.3                |          |      |                       | 8933.6               |          |      |                       | 205537.6        |            |      |                       |
| η <sup>2</sup> ,% |                  | 76.2                  |          |      |                       | 35.5                 |          |      |                       | 26.5            |            |      |                       |

| Effect            | Degr. of Freedom | SS                   | MS         | F    | p                     | SS                     | MS         | F    | p                     | SS                       | MS       | F    | p                     |
|-------------------|------------------|----------------------|------------|------|-----------------------|------------------------|------------|------|-----------------------|--------------------------|----------|------|-----------------------|
|                   |                  | myo-inositol         |            |      |                       | galactinols            |            |      |                       | phytol                   |          |      |                       |
| Conditions        | 1                | 30507486.5           | 30507486.5 | 66.5 | 0.01×10 <sup>-6</sup> | 2103.9                 | 2103.9     | 5.9  | 0.02                  | 1485.9                   | 1485.9   | 80.0 | 0.02×10 <sup>-7</sup> |
| Error             | 26               | 11924789.4           | 458645.7   |      |                       | 9230.8                 | 355.0      |      |                       | 482.8                    | 18.6     |      |                       |
| Total             | 27               | 42432275.9           |            |      |                       | 11334.7                |            |      |                       | 1968.8                   |          |      |                       |
| η <sup>2</sup> ,% |                  | 71.9                 |            |      |                       | 18.6                   |            |      |                       | 75.5                     |          |      |                       |
|                   |                  | sucrose              |            |      |                       | fructose               |            |      |                       | rutinose and derivatives |          |      |                       |
| Conditions        | 1                | 38468142.7           | 38468142.7 | 24.1 | 0.04×10 <sup>-3</sup> | 910427.8               | 910427.8   | 4.5  | 0.04                  | 36152.4                  | 36152.4  | 6.5  | 0.02                  |
| Error             | 26               | 41467182.9           | 1594891.7  |      |                       | 5265822.3              | 202531.6   |      |                       | 144059.8                 | 5540.8   |      |                       |
| Total             | 27               | 79935325.6           |            |      |                       | 6176250.1              |            |      |                       | 180212.2                 |          |      |                       |
| η <sup>2</sup> ,% |                  | 48.1                 |            |      |                       | 14.7                   |            |      |                       | 20.1                     |          |      |                       |
|                   |                  | mannose + galactose  |            |      |                       | glucose                |            |      |                       |                          |          |      |                       |
| Conditions        | 1                | 4566223.1            | 4566223.1  | 11.7 | 0.02×10 <sup>-1</sup> | 10950048.3             | 10950048.3 | 13.2 | 0.01×10 <sup>-1</sup> |                          |          |      |                       |
| Error             | 26               | 10140808.0           | 390031.1   |      |                       | 21524055.1             | 827848.3   |      |                       |                          |          |      |                       |
| Total             | 27               | 14707031.1           |            |      |                       | 32474103.4             |            |      |                       |                          |          |      |                       |
| η <sup>2</sup> ,% |                  | 31.0                 |            |      |                       | 33.7                   |            |      |                       |                          |          |      |                       |
|                   |                  | stigmasterol         |            |      |                       | β-sitosterol           |            |      |                       | palmitic acid (C16:0)    |          |      |                       |
| Conditions        | 1                | 18487.8              | 18487.8    | 6.6  | 0.02                  | 95272.2                | 95272.2    | 51.3 | 0.01×10 <sup>-5</sup> | 190897.0                 | 190897.0 | 10.2 | 0.04×10 <sup>-1</sup> |
| Error             | 26               | 73182.4              | 2814.7     |      |                       | 48287.1                | 1857.2     |      |                       | 486916.5                 | 18727.6  |      |                       |
| Total             | 27               | 91670.1              |            |      |                       | 143559.3               |            |      |                       | 677813.5                 |          |      |                       |
| η <sup>2</sup> ,% |                  | 20.2                 |            |      |                       | 66.4                   |            |      |                       | 28.2                     |          |      |                       |
|                   |                  | stearic acid (C18:0) |            |      |                       | arachidic acid (C20:0) |            |      |                       | oleic acid (C18:1)       |          |      |                       |
| Conditions        | 1                | 61452.6              | 61452.6    | 14.9 | 0.01×10 <sup>-1</sup> | 12.7                   | 12.7       | 8.5  | 0.01                  | 12304.2                  | 12304.2  | 5.6  | 0.03                  |
| Error             | 26               | 107259.8             | 4125.4     |      |                       | 39.0                   | 1.5        |      |                       | 57532.0                  | 2212.8   |      |                       |
| Total             | 27               | 168712.4             |            |      |                       | 51.8                   |            |      |                       | 69836.1                  |          |      |                       |
| η <sup>2</sup> ,% |                  | 36.4                 |            |      |                       | 24.6                   |            |      |                       | 17.6                     |          |      |                       |
|                   |                  |                      |            |      |                       |                        |            |      |                       |                          |          |      |                       |

| Effect            | Degr. of Freedom | SS                    | MS      | F    | p                     | SS       | MS       | F    | p                     | SS            | MS        | F   | p    |
|-------------------|------------------|-----------------------|---------|------|-----------------------|----------|----------|------|-----------------------|---------------|-----------|-----|------|
|                   |                  | linoleic acid (C18:2) |         |      |                       | OH28:0   |          |      |                       | acylglycerols |           |     |      |
| Conditions        | 1                | 42312.6               | 42312.6 | 19.7 | 0.01×10 <sup>-2</sup> | 224.1    | 224.1    | 21.6 | 0.01×10 <sup>-2</sup> | 4810695.4     | 4810695.4 | 5.1 | 0.03 |
| Error             | 26               | 55928.2               | 2151.1  |      |                       | 269.9    | 10.4     |      |                       | 24548107.4    | 944158.0  |     |      |
| Total             | 27               | 98240.8               |         |      |                       | 494.1    |          |      |                       | 29358802.7    |           |     |      |
| η <sup>2</sup> ,% |                  | 43.1                  |         |      |                       | 45.4     |          |      |                       | 16.4          |           |     |      |
|                   |                  | pyrogallol            |         |      |                       | urea     |          |      |                       | adenosine     |           |     |      |
| Conditions        | 1                | 106.5                 | 106.5   | 16.7 | 0.04×10 <sup>-2</sup> | 360308.1 | 360308.1 | 20.1 | 0.01×10 <sup>-2</sup> | 696.1         | 696.1     | 7.2 | 0.01 |
| Error             | 26               | 166.1                 | 6.4     |      |                       | 465672.0 | 17910.5  |      |                       | 2526.3        | 97.2      |     |      |
| Total             | 27               | 272.6                 |         |      |                       | 825980.1 |          |      |                       | 3222.4        |           |     |      |
| η <sup>2</sup> ,% |                  | 39.1                  |         |      |                       | 43.6     |          |      |                       | 21.6          |           |     |      |

SS – sum of squares; MS – mean squares; F – Fisher criterion value; p – significance level; η<sup>2</sup>, % – effect size, percentage; Total – total variability; Error – residual variability.

**Table S6.** The results of one-way ANOVA (analysis of variance) to identify associations between the metabolite content variability in mung bean sprouts and the accessions (genotype).

| Effect            | Degr. of Freedom | SS           | MS       | F   | p    | SS              | MS    | F   | p    | SS                     | MS     | F   | p    |
|-------------------|------------------|--------------|----------|-----|------|-----------------|-------|-----|------|------------------------|--------|-----|------|
|                   |                  | Citric acid  |          |     |      | Nicotinic acid  |       |     |      | 4-hydroxycinnamic acid |        |     |      |
| Accessions        | 2                | 483964.1     | 241982.0 | 3.5 | 0.04 | 929.7           | 464.9 | 4.3 | 0.02 | 4973.1                 | 2486.6 | 3.6 | 0.04 |
| Error             | 25               | 1746125.4    | 69845.0  |     |      | 2687.2          | 107.5 |     |      | 17097.7                | 683.9  |     |      |
| Total             | 27               | 2230089.5    |          |     |      | 3616.9          |       |     |      | 22070.8                |        |     |      |
| η <sup>2</sup> ,% |                  | 21.7         |          |     |      | 25.7            |       |     |      | 22.5                   |        |     |      |
|                   |                  | Ribonic acid |          |     |      | Erythronic acid |       |     |      | Valine                 |        |     |      |

| Effect                       | Degr. of Freedom | SS                   | MS         | F   | p     | SS                  | MS       | F    | p       | SS                       | MS       | F   | p     |
|------------------------------|------------------|----------------------|------------|-----|-------|---------------------|----------|------|---------|--------------------------|----------|-----|-------|
| <b>Accessions</b>            | 2                | 1212.6               | 606.3      | 5.2 | 0.01  | 520.7               | 260.4    | 5.4  | 0.01    | 481966.3                 | 240983.1 | 6.7 | 0.004 |
| <b>Error</b>                 | 25               | 2940.4               | 117.6      |     |       | 1208.9              | 48.4     |      |         | 895389.6                 | 35815.6  |     |       |
| <b>Total</b>                 | 27               | 4153.0               |            |     |       | 1729.6              |          |      |         | 1377355.9                |          |     |       |
| <b><math>\eta^2</math>,%</b> |                  | 29.2                 |            |     |       | 15.4                |          |      |         | 35.0                     |          |     |       |
| <b>Accessions</b>            | 2                | Leucine + isoleucine |            |     |       | Tryptophan          |          |      |         | Serine                   |          |     |       |
|                              |                  | 236053.4             | 118026.7   | 6.2 | 0.006 | 3648.6              | 1824.3   | 4.4  | 0.02    | 6628.1                   | 3314.1   | 7.7 | 0.002 |
| <b>Error</b>                 | 25               | 478700.8             | 19148.0    |     |       | 10310.8             | 412.4    |      |         | 10724.5                  | 429.0    |     |       |
| <b>Total</b>                 | 27               | 714754.2             |            |     |       | 13959.4             |          |      |         | 17352.7                  |          |     |       |
| <b><math>\eta^2</math>,%</b> |                  | 33.0                 |            |     |       | 26.1                |          |      |         | 38.2                     |          |     |       |
| <b>Accessions</b>            | 2                | Tyrosine             |            |     |       | Oxoproline          |          |      |         | Sorbitol                 |          |     |       |
|                              |                  | 130994.8             | 65497.4    | 4.2 | 0.02  | 33315.7             | 16657.9  | 13.9 | 0.00008 | 2959.9                   | 1480.0   | 6.2 | 0.006 |
| <b>Error</b>                 | 25               | 393879.5             | 15755.2    |     |       | 29908.6             | 1196.3   |      |         | 5973.7                   | 238.9    |     |       |
| <b>Total</b>                 | 27               | 524874.3             |            |     |       | 63224.4             |          |      |         | 8933.6                   |          |     |       |
| <b><math>\eta^2</math>,%</b> |                  | 25.0                 |            |     |       | 52.7                |          |      |         | 33.1                     |          |     |       |
| <b>Accessions</b>            | 2                | Methyl-inositol      |            |     |       | Ononitol            |          |      |         | Chiro-inositol           |          |     |       |
|                              |                  | 52544418.0           | 26272209.0 | 6.7 | 0.004 | 67733.5             | 33866.8  | 6.1  | 0.006   | 465409.9                 | 232705.0 | 6.0 | 0.007 |
| <b>Error</b>                 | 25               | 97585203.6           | 3903408.1  |     |       | 137804.1            | 5512.2   |      |         | 975964.6                 | 39038.6  |     |       |
| <b>Total</b>                 | 27               | 150129621.6          |            |     |       | 205537.6            |          |      |         | 1441374.5                |          |     |       |
| <b><math>\eta^2</math>,%</b> |                  | 35.0                 |            |     |       | 33.0                |          |      |         | 32.3                     |          |     |       |
| <b>Accessions</b>            | 2                | Rhamnose             |            |     |       | Glucose derivatives |          |      |         | Rutinose and derivatives |          |     |       |
|                              |                  | 37.9                 | 19.0       | 5.6 | 0.009 | 307246.3            | 153623.1 | 16.0 | 0.00009 | 56495.1                  | 28247.6  | 5.7 | 0.009 |
| <b>Error</b>                 | 25               | 84.3                 | 3.4        |     |       | 240730.2            | 9629.2   |      |         | 123717.1                 | 4948.7   |     |       |
| <b>Total</b>                 | 27               | 122.2                |            |     |       | 547976.5            |          |      |         | 180212.2                 |          |     |       |
| <b><math>\eta^2</math>,%</b> |                  | 31.0                 |            |     |       | 56.1                |          |      |         | 31.3                     |          |     |       |
|                              |                  | Campesterol          |            |     |       | Stigmasterol        |          |      |         | C20:0                    |          |     |       |

| Effect       | Degr. of Freedom | SS       | MS      | F   | p    | SS         | MS        | F   | p     | SS     | MS    | F   | p    |
|--------------|------------------|----------|---------|-----|------|------------|-----------|-----|-------|--------|-------|-----|------|
| Accessions   | 2                | 412.4    | 206.2   | 3.8 | 0.04 | 34352.4    | 17176.2   | 7.5 | 0.002 | 15.5   | 7.7   | 5.3 | 0.01 |
| Error        | 25               | 1345.4   | 53.8    |     |      | 57317.8    | 2292.7    |     |       | 36.3   | 1.5   |     |      |
| Total        | 27               | 1757.9   |         |     |      | 91670.1    |           |     |       | 51.8   |       |     |      |
| $\eta^2, \%$ |                  | 23.5     |         |     |      | 37.5       |           |     |       | 29.9   |       |     |      |
| Accessions   | 2                | 91561.8  | 45780.9 | 5.1 | 0.01 | 8183609.2  | 4091804.6 | 4.8 | 0.02  | 815.4  | 407.7 | 4.2 | 0.02 |
| Error        | 25               | 222470.8 | 8898.8  |     |      | 21175193.5 | 847007.7  |     |       | 2407.1 | 96.3  |     |      |
| Total        | 27               | 314032.6 |         |     |      | 29358802.7 |           |     |       | 3222.4 |       |     |      |
| $\eta^2, \%$ | 25               | 29.2     |         |     |      | 27.9       |           |     |       | 25.3   |       |     |      |

SS – sum of squares; MS – mean squares; F – Fisher criterion value; p – significance level;  $\eta^2, \%$  – effect size, percentage; Total – total variability; Error – residual variability.

**Table S7.** Factorial Anova results to identify relationships between the variability of metabolite content in mungbean sprouts, the accession (genotype), the sprout germination conditions and the interaction of conditions\*accessions (genotypes)

| Effect                | Df | SS        | MS       | F    | p                     | SS      | MS      | F        | p     | SS     | MS    | F   | p     |
|-----------------------|----|-----------|----------|------|-----------------------|---------|---------|----------|-------|--------|-------|-----|-------|
| Accessions            | 2  | 483964.1  | 241982.0 | 20.5 | 0.09×10 <sup>-4</sup> | 4973.15 | 2486.57 | 5.02803  | 0.02  | 1212.6 | 606.3 | 6.1 | 0.008 |
| Conditions            | 1  | 840687.6  | 840687.6 | 71.2 | 0.02×10 <sup>-5</sup> | 5331.16 | 5331.16 | 10.77997 | 0.003 | 592.4  | 592.4 | 5.9 | 0.02  |
| Conditions*Accessions | 2  | 650765.8  | 325382.9 | 27.5 | 0.01×10 <sup>-3</sup> | 620.49  | 310.24  | 0.62734  | 0.54  | 110.5  | 55.24 | 0.6 | 0.58  |
| Error                 | 22 | 259807.4  | 11809.4  |      |                       | 10879.9 | 494.5   |          |       | 2188.6 | 99.5  |     |       |
| Total                 | 27 | 2230090.5 |          |      |                       | 22070.8 |         |          |       | 4153.0 |       |     |       |

| Effect                | Df | SS                       | MS     | F    | p                     | SS              | MS         | F    | p     | SS            | MS      | F    | p                     |
|-----------------------|----|--------------------------|--------|------|-----------------------|-----------------|------------|------|-------|---------------|---------|------|-----------------------|
| $\eta^2A$ , %         |    | 21.7                     |        |      |                       | 22.5            |            |      |       | 29.2          |         |      |                       |
| $\eta^2C$ , %         |    | 37.7                     |        |      |                       | 24.2            |            |      |       | 14.3          |         |      |                       |
| $\eta^2 C^*A$ , %     |    | 29.2                     |        |      |                       | 2.8             |            |      |       | 2.7           |         |      |                       |
|                       |    | Erythronic acid          |        |      |                       | Tryptophan      |            |      |       | Tyrosine      |         |      |                       |
| Accessions            | 2  | 520.7                    | 260.4  | 5.1  | 0.02                  | 3648.6          | 1824.3     | 7.4  | 0.004 | 130994.8      | 65497.4 | 7.8  | 0.003                 |
| Conditions            | 1  | 78.6                     | 78.6   | 1.5  | 0.23                  | 3783.6          | 3783.6     | 15.3 | 0.001 | 98685.3       | 98685.3 | 11.8 | 0.002                 |
| Conditions*Accessions | 2  | 2.1                      | 1.0    | 0.0  | 0.98                  | 1078.1          | 539.1      | 2.2  | 0.14  | 96876.4       | 48438.2 | 5.8  | 0.01                  |
| Error                 | 22 | 1129.0                   | 51.3   |      |                       | 5439.5          | 247.3      |      |       | 184698.1      | 8395.4  |      |                       |
| Total                 | 27 | 1729.6                   |        |      |                       | 13959.4         |            |      |       | 524874.3      |         |      |                       |
| $\eta^2A$ , %         |    | 30.1                     |        |      |                       | 26.1            |            |      |       | 25.0          |         |      |                       |
| $\eta^2C$ , %         |    | 4.5                      |        |      |                       | 27.1            |            |      |       | 18.8          |         |      |                       |
| $\eta^2 C^*A$ , %     |    | 0.1                      |        |      |                       | 7.7             |            |      |       | 18.5          |         |      |                       |
|                       |    | Sorbitol                 |        |      |                       | Methyl-inositol |            |      |       | Ononitol      |         |      |                       |
| Accessions            | 2  | 2959.9                   | 1480.0 | 15.6 | 0.01×10 <sup>-2</sup> | 52544418.0      | 26272209.0 | 8.6  | 0.002 | 67733.5       | 33866.8 | 14.1 | 0.01×10 <sup>-2</sup> |
| Conditions            | 1  | 3053.1                   | 3053.1 | 32.1 | 0.01×10 <sup>-3</sup> | 30106519.1      | 30106519.1 | 9.9  | 0.005 | 51860.3       | 51860.3 | 21.5 | 0.01×10 <sup>-2</sup> |
| Conditions*Accessions | 2  | 714.5                    | 357.3  | 3.8  | 0.04                  | 1575428.6       | 787714.3   | 0.3  | 0.77  | 30333.6       | 15166.8 | 6.3  | 0.007                 |
| Error                 | 22 | 2091.8                   | 95.1   |      |                       | 66957932.5      | 3043542.4  |      |       | 52962.4       | 2407.4  |      |                       |
| Total                 | 27 | 8933.6                   |        |      |                       | 150129621.6     |            |      |       | 205537.6      |         |      |                       |
| $\eta^2A$ , %         |    | 33.1                     |        |      |                       | 35.0            |            |      |       | 33.0          |         |      |                       |
| $\eta^2C$ , %         |    | 34.2                     |        |      |                       | 20.1            |            |      |       | 25.2          |         |      |                       |
| $\eta^2 C^*A$ , %     |    | 8.0                      |        |      |                       | 1.0             |            |      |       | 14.8          |         |      |                       |
|                       |    | Rutinose and derivatives |        |      |                       | Stigmasterol    |            |      |       | Acylglycerols |         |      |                       |

| Effect                | Df | SS       | MS      | F    | p                     | SS      | MS      | F    | p                     | SS         | MS        | F   | p    |
|-----------------------|----|----------|---------|------|-----------------------|---------|---------|------|-----------------------|------------|-----------|-----|------|
| Accessions            | 2  | 56495.1  | 28247.6 | 16.8 | 0.04×10 <sup>-3</sup> | 34352.4 | 17176.2 | 16.7 | 0.04×10 <sup>-3</sup> | 8183609.2  | 4091804.6 | 6.3 | 0.01 |
| Conditions            | 1  | 44516.6  | 44516.6 | 26.5 | 0.04×10 <sup>-3</sup> | 20124.7 | 20124.7 | 19.6 | 0.02×10 <sup>-3</sup> | 4907770.5  | 4907770.5 | 7.5 | 0.01 |
| Conditions*Accessions | 2  | 50571.8  | 25285.9 | 15.0 | 0.08×10 <sup>-3</sup> | 16238.8 | 8119.4  | 7.9  | 0.003                 | 2059111.9  | 1029556.0 | 1.6 | 0.23 |
| Error                 | 22 | 36992.9  | 1681.5  |      |                       | 22591.2 | 1026.9  |      |                       | 14305386.2 | 650244.8  |     |      |
| Total                 | 27 | 180212.2 |         |      |                       | 91670.1 |         |      |                       | 29358802.7 |           |     |      |
| η <sup>2</sup> A, %   |    | 31.3     |         |      |                       | 37.5    |         |      |                       | 27.9       |           |     |      |
| η <sup>2</sup> C, %   |    | 24.7     |         |      |                       | 22.0    |         |      |                       | 16.7       |           |     |      |
| η <sup>2</sup> C*A,%  |    | 28.1     |         |      |                       | 17.7    |         |      |                       | 7.0        |           |     |      |

SS – sum of squares; MS – mean squares; F – Fisher criterion value; p – significance level; df –degrees of freedom; η<sup>2</sup>A, % – effect size (Accessions), percentage; η<sup>2</sup>C, % – effect size (Conditions), percentage; η<sup>2</sup>A\*C, % – effect size (Accessions\* Conditions), percentage; Total – total variability; Error – residual variability. Reliable data is highlighted in bold

**Table S8.** Factor loadings on the characters (identified compounds) of mung bean sprouts.

| Characters                                      | Factor 1 | Factor 2 | Factor 3 |
|-------------------------------------------------|----------|----------|----------|
| Lactic acid                                     | 0.686221 | 0.146976 | 0.001263 |
| Pyruvic acid                                    | 0.585759 | 0.42328  | -0.05038 |
| Oxalic acid                                     | 0.711    | 0.229526 | 0.359304 |
| Succinic acid                                   | 0.854075 | 0.252457 | 0.183851 |
| Malic acid                                      | -0.08076 | 0.639518 | -0.58716 |
| Shikimic acid                                   | 0.070868 | 0.556096 | -0.69704 |
| Citric acid                                     | -0.63744 | 0.689181 | -0.15812 |
| Quinic acid                                     | 0.333169 | 0.278373 | -0.43568 |
| Tartaric acid                                   | 0.580958 | 0.440672 | 0.147903 |
| Fumaric acid                                    | 0.544521 | 0.632771 | -0.14688 |
| 3-hydroxypropionic acid                         | 0.538392 | 0.443998 | 0.339974 |
| Caffeic acid                                    | 0.445336 | 0.270756 | 0.266006 |
| 2,3-dihydroxybenzoic acid                       | -0.27578 | 0.297858 | -0.12136 |
| Benzoic acid                                    | -0.38453 | 0.599171 | 0.039918 |
| Nicotinic acid                                  | -0.16276 | 0.267771 | 0.633251 |
| 4-hydroxycinnamic acid                          | 0.44111  | 0.346902 | 0.512598 |
| Maleic acid                                     | -0.31918 | 0.363778 | -0.07509 |
| Azelaic acid                                    | 0.137888 | -0.23363 | -0.18008 |
| Aconitic acid                                   | -0.51079 | 0.529946 | 0.151912 |
| Dehydroabietic acid                             | 0.004739 | -0.31875 | -0.01503 |
| Methylmalonic acid                              | -0.10401 | -0.02375 | -0.27629 |
| Citraconic acid                                 | -0.16011 | -0.27249 | -0.17179 |
| Mesoxalic acid                                  | 0.213338 | 0.118137 | 0.376302 |
| Saccharic acid                                  | 0.355661 | 0.505164 | -0.00339 |
| Glyceric acid                                   | 0.926924 | 0.127096 | 0.202776 |
| Methylglyceric acid                             | 0.52233  | 0.049249 | -0.21337 |
| Ribonic acid                                    | 0.435944 | 0.504105 | 0.348986 |
| Erythronic acid                                 | 0.034388 | 0.382241 | 0.724504 |
| Threonic acid                                   | 0.843159 | 0.153529 | 0.42028  |
| Total lactones of threonic and erythronic acids | 0.883638 | 0.179014 | 0.104172 |
| Gluconic acid                                   | 0.75075  | 0.196993 | 0.331246 |
| 6-phosphogluconic acid                          | 0.603613 | 0.078062 | 0.26874  |
| 2-ketogluconic acid                             | 0.164774 | -0.00526 | 0.1679   |
| Phosphoric acid                                 | -0.40792 | 0.402941 | 0.22775  |
| Phosphate + methyl phosphate                    | 0.349352 | 0.650846 | 0.260129 |
| Valine                                          | -0.26867 | -0.10305 | 0.604876 |
| Leucine + isoleucine                            | -0.25049 | 0.045866 | 0.577201 |
| Methionine                                      | -0.51798 | 0.056528 | -0.46491 |
| Threonine                                       | -0.86074 | 0.185528 | 0.121663 |

|                                    |          |          |          |
|------------------------------------|----------|----------|----------|
| Phenylalanine                      | -0.72458 | -0.08761 | 0.129495 |
| Tryptophan                         | -0.63222 | 0.555416 | 0.10731  |
| $\alpha$ -alanine                  | -0.10044 | 0.513381 | 0.015175 |
| Glycine                            | -0.60014 | -0.05266 | 0.177716 |
| Serine                             | -0.28481 | 0.314157 | 0.496309 |
| Tyrosine                           | -0.62836 | 0.586863 | 0.259194 |
| Histidine + lysine                 | -0.86172 | 0.073493 | -0.02412 |
| Aspartic acid                      | -0.37192 | 0.319679 | -0.23012 |
| Asparagine                         | -0.6994  | -0.36926 | -0.17738 |
| Glutamic acid                      | -0.71081 | -0.15564 | -0.00668 |
| Glutamine                          | -0.7773  | 0.289922 | -0.01482 |
| Proline                            | 0.397112 | 0.065202 | 0.438458 |
| Citrulline + arginine              | -0.84845 | 0.31412  | 0.069105 |
| $\beta$ -alanine                   | -0.73194 | 0.194718 | 0.318735 |
| GABA                               | -0.85581 | -0.04492 | 0.077458 |
| Oxoproline                         | 0.02632  | 0.017276 | 0.667448 |
| Hydroxyproline                     | -0.03245 | -0.19792 | -0.18859 |
| Ornithine                          | -0.76452 | -0.23415 | 0.086787 |
| Pipecolic acid                     | 0.029242 | 0.58767  | -0.17101 |
| 5-hydroxypipecolic acid            | -0.23014 | -0.10596 | 0.136299 |
| $\beta$ -phenyl- $\alpha$ -alanine | -0.57913 | 0.203182 | 0.233977 |
| Ornithine lactam                   | -0.72419 | 0.350991 | 0.261883 |
| Ethanolamine                       | 0.037943 | 0.026946 | -0.08833 |
| Glycerol                           | 0.754902 | 0.222357 | -0.20585 |
| Threitol + erythritol              | -0.56124 | 0.43559  | 0.064016 |
| Arabinitol                         | -0.43644 | 0.563598 | -0.21043 |
| Glycerol-3-phosphate               | 0.472114 | 0.586442 | 0.131162 |
| Deoxyglucitol                      | -0.8023  | 0.259372 | -0.13423 |
| Sorbitol                           | -0.68002 | 0.61717  | 0.236821 |
| Allo-inositol                      | -0.01827 | 0.075604 | 0.282131 |
| Methyl-inositol                    | -0.45731 | 0.492002 | 0.349789 |
| Ononitol                           | -0.63065 | 0.645629 | 0.118337 |
| Chiro-inositol                     | -0.46959 | 0.418404 | 0.368508 |
| Myo-inositol                       | 0.79087  | 0.090305 | 0.486719 |
| Galactinols                        | -0.36429 | 0.236661 | -0.39724 |
| Phytol                             | -0.75454 | 0.120141 | -0.35585 |
| $\alpha$ -tocopherol               | -0.48492 | 0.53333  | 0.108468 |
| Pentoses                           | 0.427297 | 0.170023 | -0.07386 |
| Rhamnose                           | -0.44898 | 0.493839 | 0.162112 |
| Fructose                           | 0.522363 | 0.304799 | -0.38717 |
| Mannose + galactose                | 0.728945 | 0.378065 | -0.09814 |
| Glucose                            | 0.746559 | 0.357251 | -0.06253 |
| Glucose derivatives                | 0.037945 | 0.600154 | -0.15994 |
| Sorbose                            | 0.290951 | 0.56109  | -0.40625 |

|                            |          |          |          |
|----------------------------|----------|----------|----------|
| Sucrose                    | 0.835551 | 0.302587 | 0.002199 |
| Rutinoside and derivatives | -0.36063 | 0.226583 | -0.44812 |
| Raffinose, etc.            | 0.026096 | 0.435903 | -0.45564 |
| Campesterol                | 0.109844 | 0.665374 | -0.20313 |
| Stigmasterol               | -0.31268 | 0.628958 | -0.28188 |
| $\beta$ -sitosterol        | 0.759476 | 0.446855 | 0.306284 |
| sterol 486                 | -0.2494  | 0.159912 | -0.40711 |
| Isotucosterol              | 0.061512 | -0.00498 | 0.303036 |
| C9:0                       | 0.00777  | -0.04431 | 0.279377 |
| C11:0                      | 0.440758 | 0.232519 | -0.49224 |
| C13:0                      | 0.5928   | 0.324754 | -0.42091 |
| C16:0                      | 0.739909 | 0.465344 | -0.29819 |
| C18:0                      | 0.742555 | 0.351589 | -0.1701  |
| C20:0                      | -0.54366 | 0.642872 | 0.037129 |
| C22:0                      | -0.09255 | -0.13022 | -0.32834 |
| C24:0                      | -0.01028 | 0.647772 | 0.064665 |
| C26:0                      | -0.47362 | 0.518132 | 0.097711 |
| C18:1                      | 0.415525 | 0.410939 | -0.11535 |
| C18:2                      | 0.748781 | 0.421113 | -0.10284 |
| C18:3                      | 0.216096 | 0.766061 | -0.24911 |
| MeC18:3                    | 0.288735 | -0.01409 | 0.555959 |
| OH18:0                     | -0.48307 | 0.571344 | 0.24081  |
| OH20:0                     | 0.213338 | 0.118137 | 0.376302 |
| OH22:0                     | -0.14023 | 0.094311 | -0.24934 |
| OH24:0                     | -0.44485 | 0.525429 | 0.237661 |
| OH26:0                     | -0.23157 | 0.253894 | -0.31175 |
| OH28:0                     | -0.60019 | 0.234025 | -0.36192 |
| Acylglycerols              | 0.582433 | 0.342166 | -0.24569 |
| Pyrogallol                 | -0.62338 | 0.171726 | -0.09538 |
| Urea                       | -0.74231 | 0.016244 | 0.204859 |
| Adenosine                  | 0.464994 | 0.224936 | -0.1643  |
| Uridine                    | 0.361193 | 0.168549 | -0.40776 |
| Antirrhinoside.            | -0.36919 | 0.400405 | 0.025232 |
| <b>Expl.Var</b>            | 31.75218 | 16.24177 | 10.35937 |
| <b>Prp.Totl</b>            | 0.273726 | 0.140015 | 0.089305 |

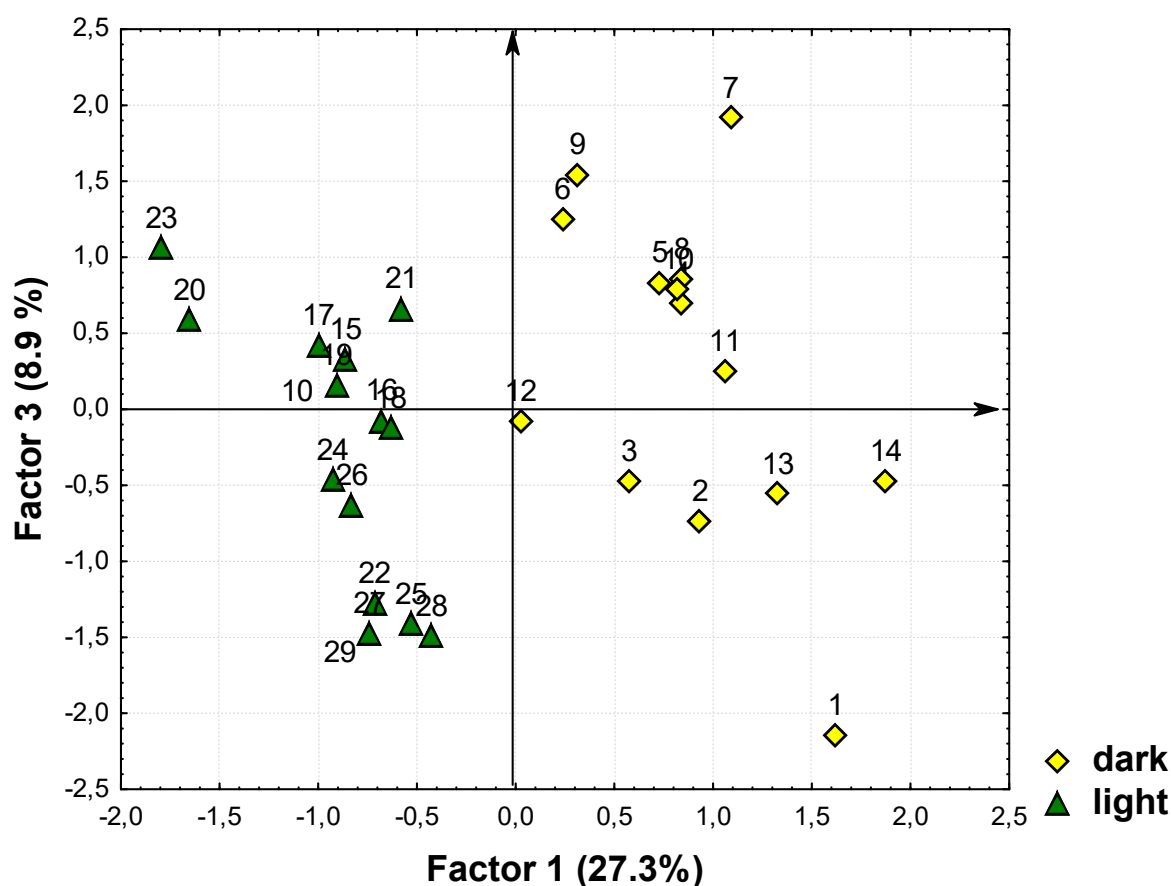

**Figure S1.** A scatterplot of mung bean sprouts in the space of the first and third factors, calculated according to the content of all identified compounds.

**Table S9.** Factor loadings on the characters (calculated as percentages of individual compounds in the total amount of each identified class of compounds (total organic acids, amino acids, saccharides, alcohols, lipids, and phytosterols).

| Characters                | Factor 1 | Factor 2 | Factor 3 |
|---------------------------|----------|----------|----------|
| Lactic acid               | 0.437561 | 0.734319 | -0.18923 |
| Pyruvic acid              | 0.33522  | 0.547552 | -0.21778 |
| Oxalic acid               | 0.791274 | 0.046994 | -0.17811 |
| Succinic acid             | 0.608265 | 0.449354 | -0.46111 |
| Malic acid                | -0.70822 | 0.217165 | 0.323612 |
| Shikimic acid             | -0.30427 | -0.25271 | 0.813118 |
| Citric acid               | -0.84496 | -0.29553 | 0.081548 |
| Quinic acid               | 0.277906 | -0.11778 | 0.492789 |
| Tartaric acid             | 0.493007 | 0.250759 | -0.03498 |
| Fumaric acid              | 0.289752 | -0.09274 | 0.072914 |
| 3-Hydroxypropionic acid   | 0.254333 | 0.448513 | -0.5914  |
| Caffeic acid              | 0.4997   | -0.15436 | -0.07859 |
| 2,3-dihydroxybenzoic acid | -0.29672 | -0.32357 | 0.087609 |

|                                                 |          |          |          |
|-------------------------------------------------|----------|----------|----------|
| Benzoic acid                                    | -0.38048 | -0.14227 | -0.08323 |
| Nicotinic acid                                  | -0.20189 | 0.435633 | -0.62405 |
| 4-hydroxycinnamic acid                          | 0.613138 | -0.39058 | -0.3105  |
| Malic acid                                      | -0.10486 | -0.32826 | 0.064813 |
| Azelaic acid                                    | 0.003757 | 0.32585  | -0.0047  |
| Aconitic acid                                   | -0.42448 | -0.27015 | -0.02795 |
| Dehydroabietic acid                             | 0.114083 | 0.054431 | -0.09964 |
| Methylmalonic acid                              | -0.16211 | -0.0392  | 0.189548 |
| Citraconic acid                                 | -0.18924 | 0.260183 | 0.024729 |
| Mesoxalic acid                                  | 0.176994 | -0.26894 | -0.21735 |
| Saccharic acid                                  | 0.257795 | 0.099342 | 0.204198 |
| Glyceric acid                                   | 0.899465 | 0.09659  | -0.17026 |
| Methylglyceric acid                             | 0.421297 | 0.459812 | 0.378895 |
| Ribonic acid                                    | 0.454008 | -0.04669 | -0.27833 |
| Erythronic acid                                 | 0.20818  | -0.29601 | -0.68071 |
| Threonic acid                                   | 0.868048 | -0.22018 | -0.30234 |
| Total lactones of threonic and erythronic acids | 0.846503 | -0.05398 | -0.09043 |
| Gluconic acid                                   | 0.765791 | -0.09955 | -0.16276 |
| 6-phosphogluconic acid                          | 0.610632 | -0.17823 | -0.20584 |
| 2-ketogluconic acid                             | 0.19898  | -0.14009 | -0.17217 |
| Valine                                          | 0.808511 | -0.34706 | -0.34609 |
| Leucine + Isoleucine                            | 0.771645 | -0.34467 | -0.24469 |
| Threonine                                       | -0.11442 | -0.57716 | 0.093483 |
| Methionine                                      | -0.52704 | -0.15887 | 0.363091 |
| Phenylalanine                                   | -0.71508 | 0.333066 | -0.24174 |
| Tryptophan                                      | -0.47757 | -0.59347 | -0.16255 |
| Lysine + Histidine                              | -0.44568 | 0.423899 | 0.331434 |
| Arginine + Citrulline                           | -0.72705 | -0.10099 | 0.048552 |
| $\alpha$ -Alanine                               | 0.6877   | 0.179179 | 0.326194 |
| Glycine                                         | -0.33508 | 0.219084 | -0.30073 |
| Proline                                         | 0.765797 | -0.05777 | -0.00876 |
| Serine                                          | 0.879865 | -0.23086 | 0.034734 |
| Tyrosine                                        | -0.54798 | -0.3992  | -0.19066 |
| Aspartic acid                                   | 0.704507 | -0.16702 | 0.427203 |
| Asparagine                                      | -0.62343 | 0.422808 | 0.202928 |
| Glutamic acid                                   | 0.588536 | 0.081303 | 0.290364 |
| Glutamine                                       | -0.11602 | -0.18513 | 0.230136 |
| $\beta$ -Alanine                                | -0.12034 | -0.4435  | -0.38829 |
| GABA                                            | -0.56099 | -0.10261 | -0.29736 |
| Hydroxyproline                                  | 0.090713 | 0.051803 | 0.358483 |
| Oxoproline                                      | 0.60012  | -0.28406 | -0.20976 |
| $\beta$ -phenyl- $\alpha$ -alanine              | -0.52658 | -0.05511 | -0.22341 |
| Pipecolic acid                                  | 0.450656 | -0.30449 | 0.480204 |
| 5-hydroxypipecolic acid                         | -0.25066 | 0.164287 | -0.31062 |

|                                 |          |          |          |
|---------------------------------|----------|----------|----------|
| Ornithine                       | -0.73109 | 0.355966 | -0.28796 |
| Ornithine lactam                | -0.47887 | -0.32055 | -0.37375 |
| Ethanolamine                    | -0.20834 | 0.630377 | 0.042034 |
| Glycerol                        | 0.550472 | 0.117388 | 0.654013 |
| Threitol + erythritol           | -0.54728 | -0.09119 | 0.169697 |
| Arabinitol                      | -0.37735 | 0.222879 | 0.614675 |
| Glycerol-3-phosphate            | 0.347244 | -0.07877 | 0.461674 |
| Deoxyglucitol                   | -0.7707  | 0.168442 | 0.010178 |
| Sorbitol                        | -0.86182 | -0.06075 | -0.10566 |
| Allo-inositol                   | 0.048997 | -0.12973 | -0.26307 |
| Methyl-inositol                 | -0.90819 | 0.01001  | -0.14538 |
| Ononitol                        | -0.73604 | -0.43383 | -0.02329 |
| Chiro-inositol                  | -0.61471 | -0.08459 | -0.22357 |
| Myo-inositol                    | 0.946847 | 0.002969 | 0.019274 |
| Galactinols                     | -0.3671  | -0.28393 | 0.2803   |
| Phytol                          | -0.73805 | 0.124392 | 0.130237 |
| $\alpha$ -tocopherol            | -0.47454 | -0.31308 | 0.054826 |
| Fatty acids                     | -0.32268 | 0.341682 | -0.50897 |
| Acylglycerols                   | 0.344226 | -0.34659 | 0.477657 |
| Total saturated fatty acids     | 0.136809 | 0.778197 | 0.220293 |
| Total unsaturated fatty acids   | -0.13681 | -0.7782  | -0.22029 |
| Campesterol                     | -0.03836 | -0.73428 | 0.320556 |
| Stigmasterol                    | -0.8655  | 0.413786 | -0.01726 |
| $\beta$ -Sitosterol             | 0.897728 | -0.32701 | -0.02223 |
| Sterol 486                      | -0.39891 | -0.16996 | 0.291818 |
| Isofucosterol                   | 0.157893 | -0.16823 | -0.18627 |
| Pentosa                         | 0.069822 | -0.01414 | 0.311984 |
| Ramnose                         | -0.53572 | -0.34946 | -0.00336 |
| Fructose                        | 0.51983  | -0.07012 | 0.411171 |
| Mannose + Galactose             | -0.4905  | 0.164481 | 0.026144 |
| Glucose + Glucose derivatives   | -0.66654 | 0.062488 | -0.10788 |
| Sorbose                         | -0.66881 | -0.19961 | 0.115218 |
| Sucrose                         | 0.651267 | -0.00493 | -0.21555 |
| Rutinose + rutinose derivatives | -0.52316 | -0.18495 | 0.455462 |
| Raffinose                       | -0.28845 | -0.11643 | 0.284726 |
| aC9:0                           | -0.14272 | 0.061954 | -0.18442 |
| aC11:0                          | 0.207606 | 0.005461 | 0.568338 |
| C13:0                           | 0.415797 | 0.216706 | 0.522303 |
| C16:0                           | 0.048253 | 0.703151 | 0.31633  |
| C18:0                           | 0.443522 | 0.418728 | -0.04292 |
| C20:0                           | -0.23778 | -0.52032 | -0.19058 |
| C22:0                           | -0.26039 | 0.625426 | -0.26238 |
| C24:0                           | -0.62642 | -0.3132  | -0.27853 |
| C26:0                           | -0.59773 | -0.18821 | 0.063597 |

|          |          |          |          |
|----------|----------|----------|----------|
| C28:0    | -0.79484 | -0.01973 | 0.099014 |
| C18:1    | 0.280832 | -0.47636 | 0.042526 |
| C18:2    | 0.60819  | -0.58806 | 0.048542 |
| C18:3    | -0.55925 | -0.39024 | -0.2874  |
| Expl.Var | 29.51966 | 11.04438 | 9.131818 |
| Prp.Totl | 0.28114  | 0.10518  | 0.086970 |

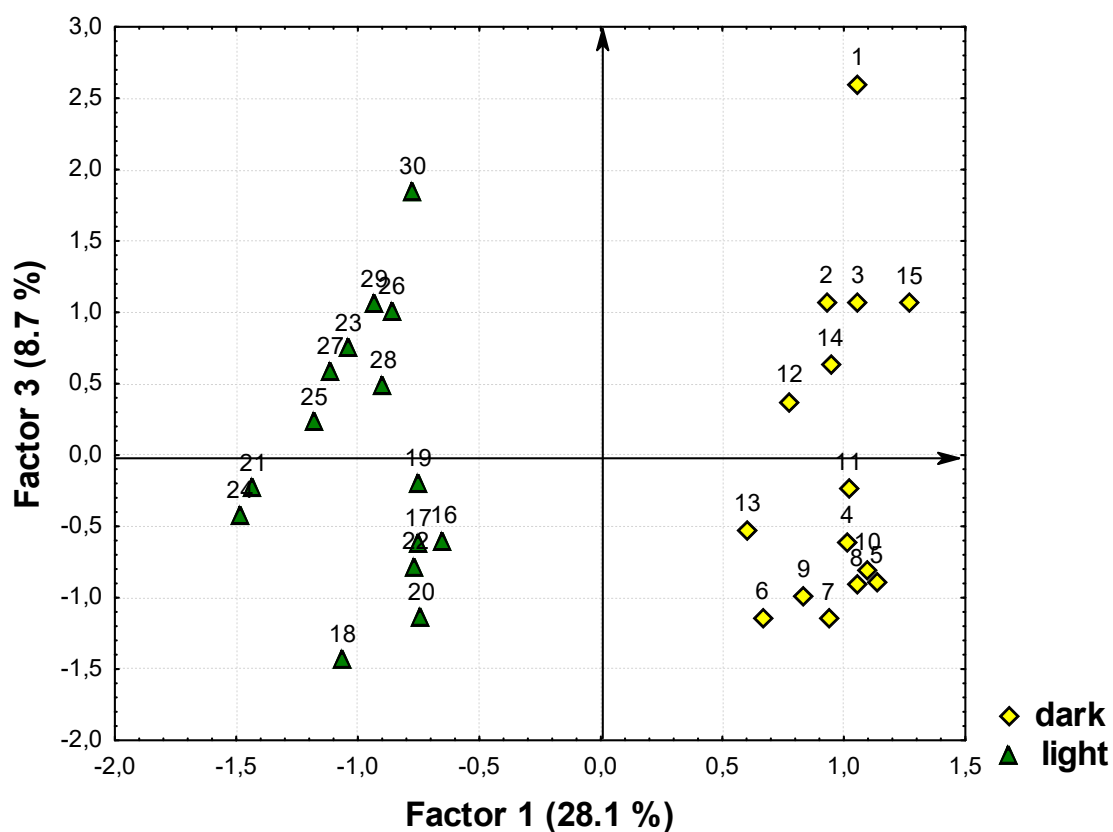

**Figure S2.** A scatterplot of mung bean sprouts in the space of the first and third factors, calculated according to the proportions of individual substances (%) in the total amount of each identified class of compounds
